# Supplementary material
Source: Springer Nature journal article supplement (https://www.springermedizin.de/resource/supplementary/12958_2003_125_MOESM2_ESM.pdf/9566174)

## HES

Ctrl 18 24 36

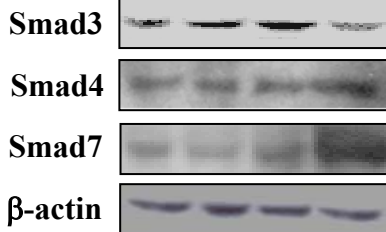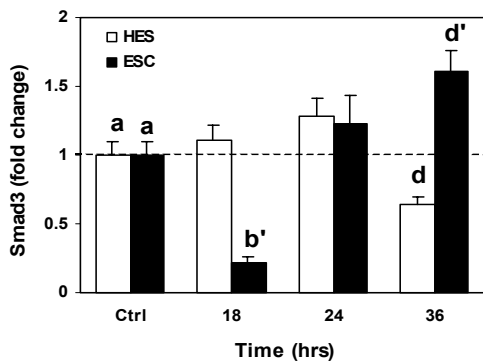

## ESC

Ctrl 18 24 36

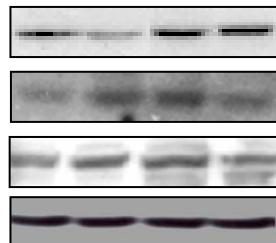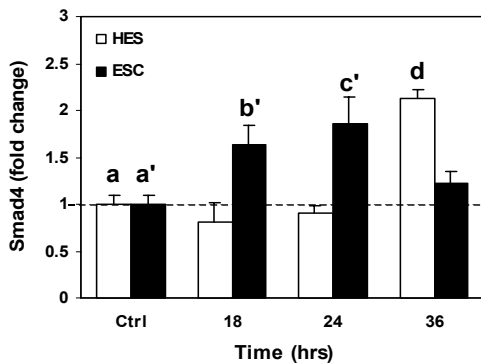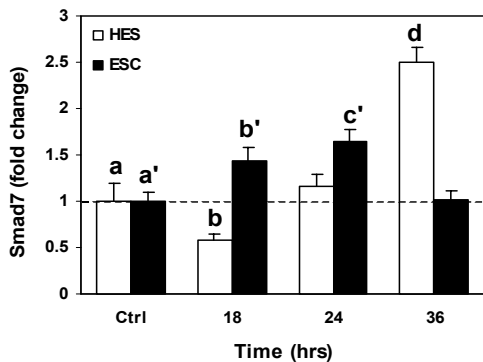

Supplement: MOESM2 [file 9566174]
